# Supplementary material
Source: publisher figshare collection journal article supplement (https://tandf.figshare.com/articles/dataset/_/7879955)
Supplement: Supplementary file 1 [file 2]

Archive with 4 entries (4 files):
- tbio_a_1595147_sm5464.pdf
- tbio_a_1595147_sm5459.pdf
- tbio_a_1595147_sm5437.pdf
- tbio_a_1595147_sm5421.pdf
