# Supplementary material
Source: publisher figshare collection journal article supplement (https://tandf.figshare.com/articles/dataset/_/7879955)

Supplementary material 4: nMDS plot for the katydid assemblage composition with zone as the grouping factor. Black circles indicate the sites and red dots the species. VegHet: vegetation heterogeneity; AveH: average vegetation height; HQI: Habitat Quality Index.

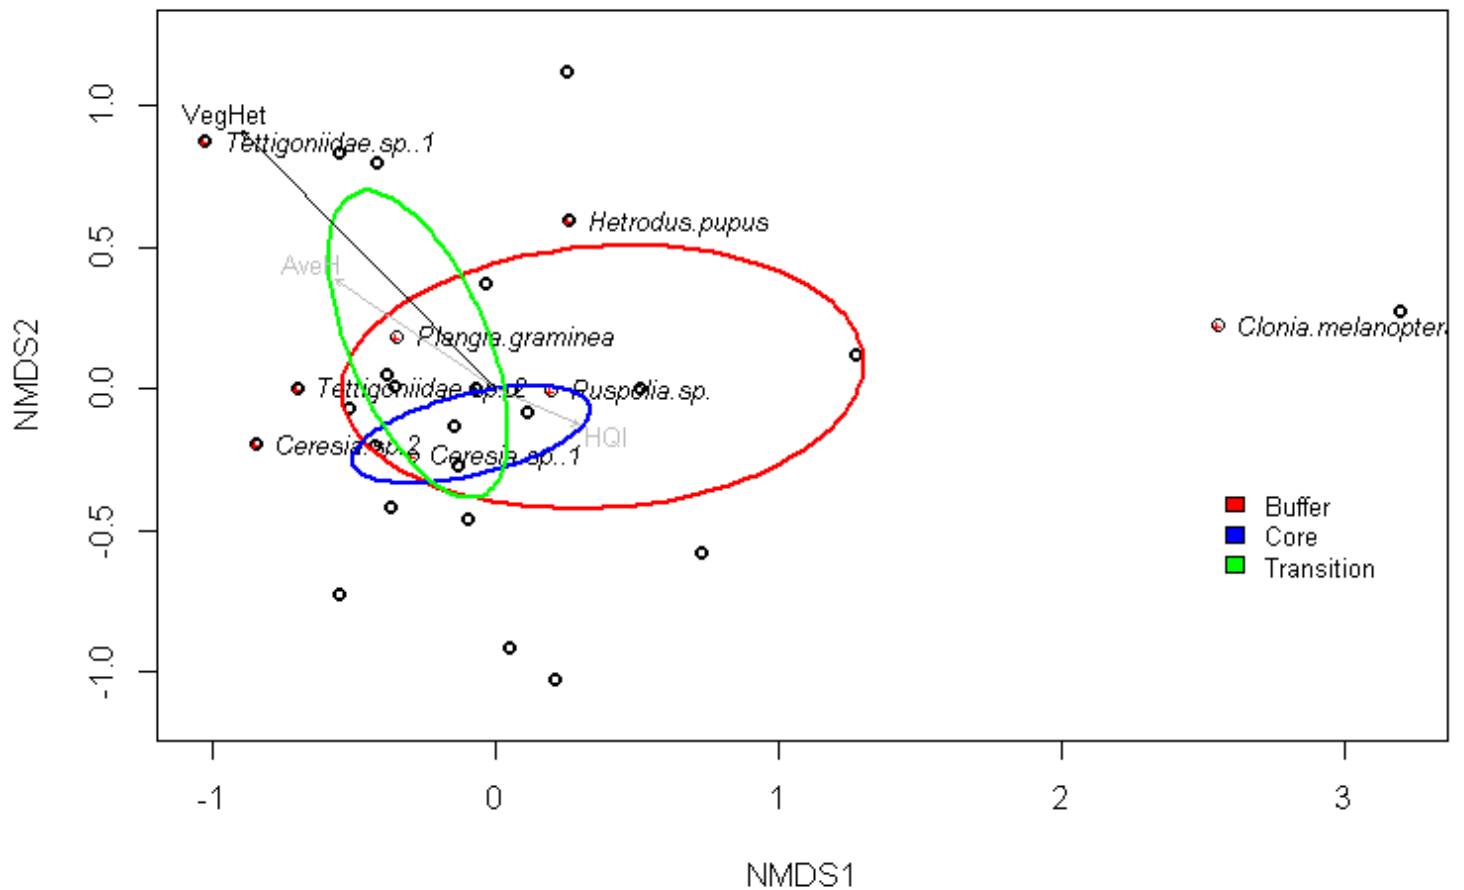

Supplement: Supplementary file 1 [file 2 › tbio_a_1595147_sm5421.pdf]
