# Supplementary material
Source: publisher figshare collection journal article supplement (https://tandf.figshare.com/articles/dataset/_/7879955)
Supplement: Supplementary file 1 [file 2 › tbio_a_1595147_sm5437.pdf]

Supplementary material 3: Spectrograms of the eight recorded species.

| Species               |                                                                                     | Spectrogram                                                                          |
|-----------------------|-------------------------------------------------------------------------------------|--------------------------------------------------------------------------------------|
| <i>Ceresia</i> sp. 1  | 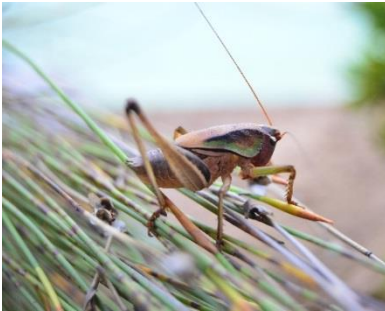   | 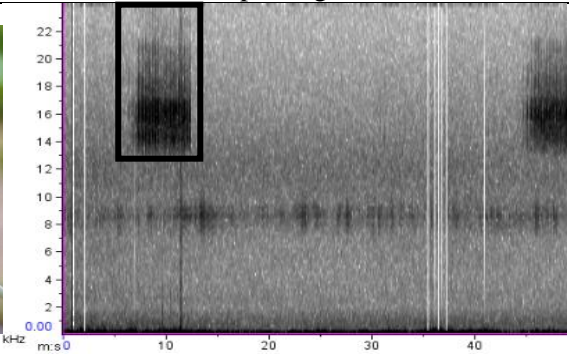   |
| <i>Ruspolia</i> sp.   | No photograph available                                                             | 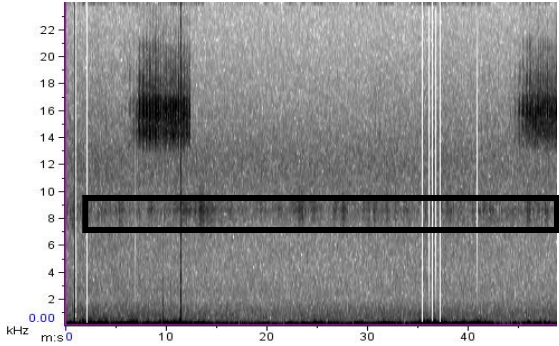  |
| <i>P. graminea</i>    | 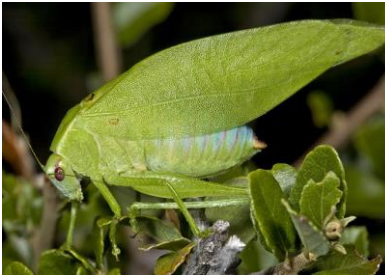 | 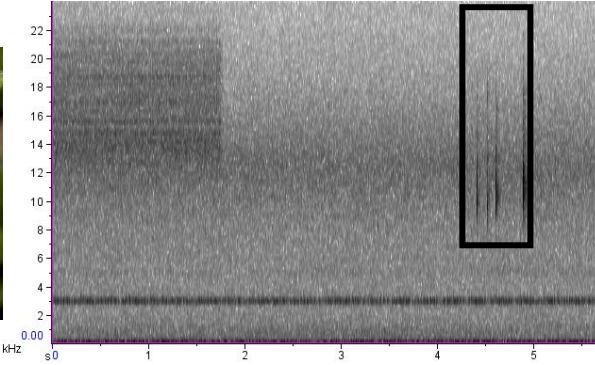 |
| <i>C. melanoptera</i> | 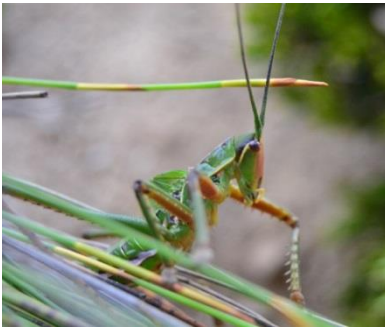 | 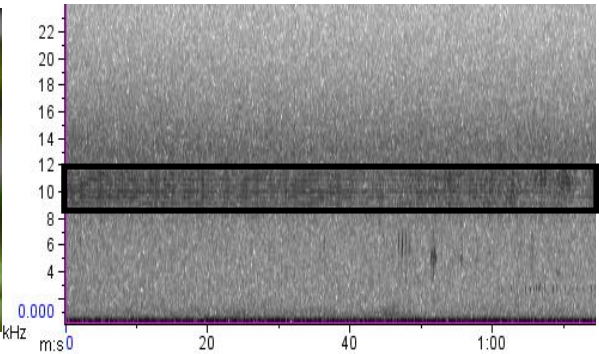 |

| Species                        | Spectrogram                                                                                                                                                              |
|--------------------------------|--------------------------------------------------------------------------------------------------------------------------------------------------------------------------|
| <p><i>Ceresia</i> sp. 2</p>    | 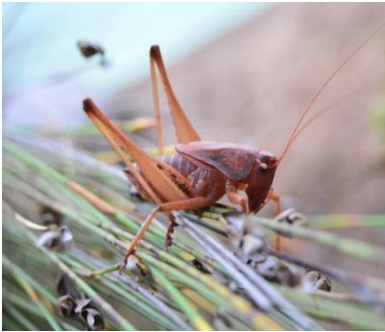 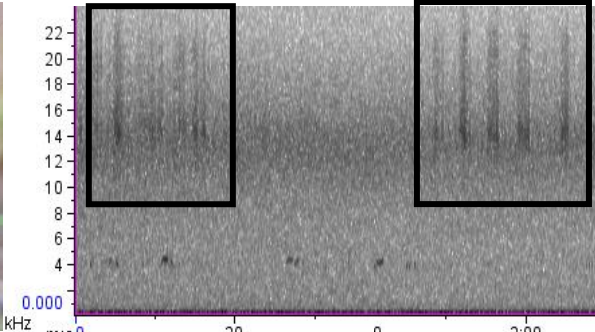     |
| <p>Tettigoniidae sp.<br/>1</p> | <p>No photograph available</p> 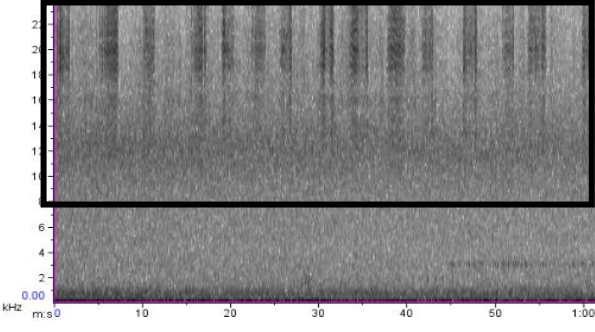                                                        |
| <p>Tettigoniidae<br/>sp. 2</p> | <p>No photograph available</p> 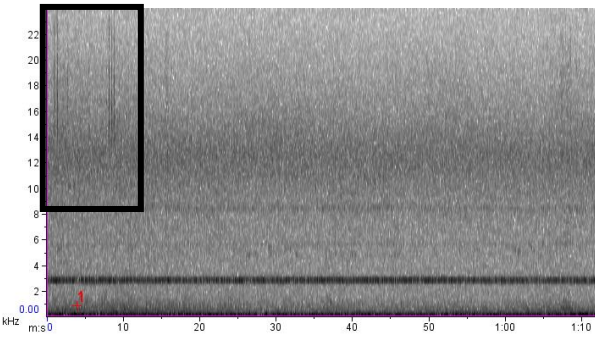                                                       |
| <p><i>H. pupus</i></p>         | 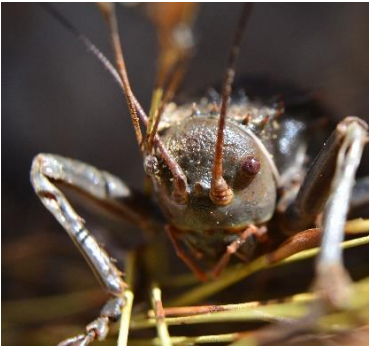 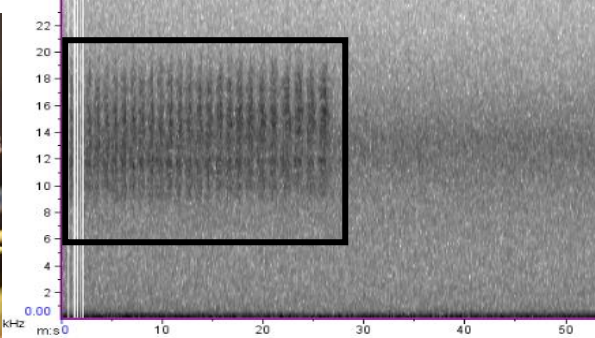 |
