# Supplementary material
Source: publisher figshare collection journal article supplement (https://tandf.figshare.com/articles/dataset/_/7879955)

Supplementary material 2: Species accumulation curve based on the katydid species observed in each night at each site

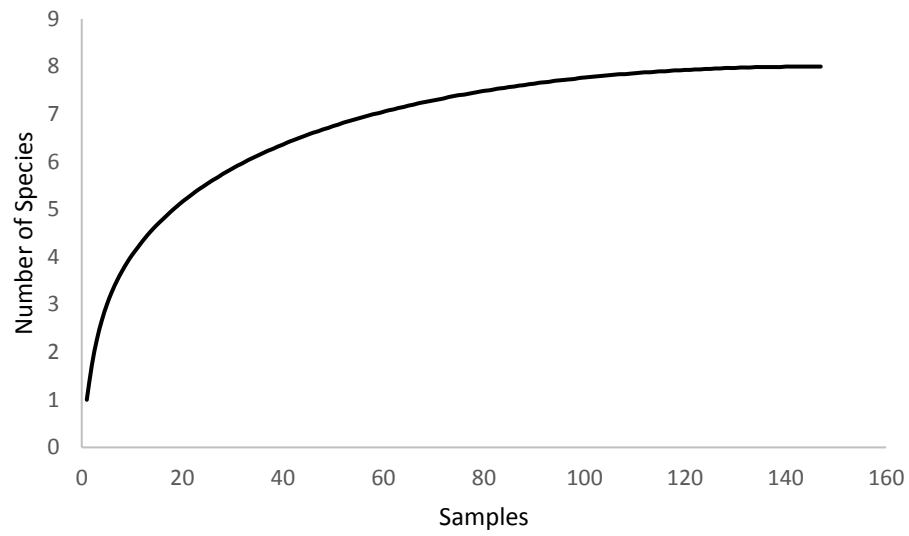

Supplement: Supplementary file 1 [file 2 › tbio_a_1595147_sm5459.pdf]
