# Supplementary material
Source: publisher figshare collection journal article supplement (https://tandf.figshare.com/articles/dataset/_/7879955)
Supplement: Supplementary file 1 [file 2 › tbio_a_1595147_sm5464.pdf]

Supplementary material 1: Correlation results between spot count abundances and calculated

AI values

| Comparison Pair                                       | Spearman rank correlation rho |
|-------------------------------------------------------|-------------------------------|
| <i>Ceresia sp. 1</i> x <i>Ceresia sp. 1</i>           | 0.60589                       |
| <i>Plangia graminea</i> x <i>Plangia graminea</i>     | 0.686724                      |
| <i>Ruspolia sp.</i> x <i>Ruspolia sp.</i>             | -0.18754                      |
| <i>Clonia melanoptera</i> x <i>Clonia melanoptera</i> | 0.719623                      |
| <i>Ceresia sp. 2</i> x <i>Ceresia sp.2</i>            | 0.719623                      |
